# Supplementary material for: Initial and supplementary indication approval of new targeted cancer drugs by the FDA, EMA, Health Canada, and TGA
Source: PubMed Central journal article supplement (PMC9288371; doi:10.1007/s10637-022-01227-5), 2022-04-07
Supplement: 10637_2022_1227_MOESM1_ESM.pdf [file 10637_2022_1227_MOESM1_ESM.pdf]

## Supplementary Online Content

Michaeli, D.T., Mill, M., Michaeli, T., Miracolo, A., Kanavos, P. Initial and supplementary indication approval of new targeted cancer drugs by the FDA, EMA, Health Canada, and TGA. *Investigational New Drugs* (2022). <https://doi.org/10.1007/s10637-022-01227-5>

**Table e1** Marketing Authorization Data Sources

**Table e2** Regulatory Approval Characteristics of Targeted Drugs Across the US (FDA), EU (EMA), Canada (HC), and Australia (TGA) – Continued

**Table e3** Pearson Correlation Coefficients of Collected Variables

This supplementary material has been provided by the authors to give readers additional information about their work.

| <b>Region</b> | <b>Agency</b> | <b>Website</b>                                                                                                                                                                                                                              |
|---------------|---------------|---------------------------------------------------------------------------------------------------------------------------------------------------------------------------------------------------------------------------------------------|
| Europe        | EMA           | <a href="https://www.ema.europa.eu/en/medicines">https://www.ema.europa.eu/en/medicines</a>                                                                                                                                                 |
| Canada        | HC            | <a href="https://www.canada.ca/en/health-canada/services/drugs-health-products/drug-products/drug-product-database.html">https://www.canada.ca/en/health-canada/services/drugs-health-products/drug-products/drug-product-database.html</a> |
| Australia     | TGA           | <a href="https://www.tga.gov.au/ws-auspar-index">https://www.tga.gov.au/ws-auspar-index</a>                                                                                                                                                 |
| USA           | FDA           | <a href="https://www.accessdata.fda.gov/scripts/cder/daf/">https://www.accessdata.fda.gov/scripts/cder/daf/</a>                                                                                                                             |

**Table e1** Marketing Authorization Data Sources

FDA: US Food and Drug Administration, EMA: European Medicines Agency, HC: Health Canada, TGA: Therapeutics Goods Administration.

|                                                          | US<br>(FDA) |               | EU<br>(EMA) |               | Canada<br>(HC) |               | Australia<br>(TGA) |               | P-Value |
|----------------------------------------------------------|-------------|---------------|-------------|---------------|----------------|---------------|--------------------|---------------|---------|
|                                                          | No.         | (%)           | No.         | (%)           | No.            | (%)           | No.                | (%)           |         |
| <b>A) Regulatory</b>                                     |             |               |             |               |                |               |                    |               |         |
| Approval Type                                            |             |               |             |               |                |               |                    |               |         |
| Standard                                                 | 52          | (54.2%)       | 74          | (80.4%)       | 41             | (47.7%)       | 72                 | (86.8%)       | <.001   |
| Conditional Approval                                     | 28          | (29.2%)       | 12          | (13.1%)       | 23             | (26.7%)       | 3                  | (3.6%)        |         |
| Priority Review                                          | 16          | (16.6%)       | 6           | (6.5%)        | 22             | (25.6%)       | 8                  | (9.6%)        |         |
| Orphan Designation                                       |             |               |             |               |                |               |                    |               | <.001   |
| No                                                       | 49          | (51.0%)       | 70          | (76.1%)       | NA             | NA            | 75                 | (90.4%)       |         |
| Yes                                                      | 47          | (49.0%)       | 22          | (23.9%)       | NA             | NA            | 8                  | (9.6%)        |         |
| MA Supporting Trial †                                    |             |               |             |               |                |               |                    |               | <.001   |
| No                                                       | 57          | (59.4%)       | 25          | (27.2%)       | 48             | (55.8%)       | 50                 | (60.2%)       |         |
| Phase 1                                                  | 7           | (7.3%)        | 14          | (15.2%)       | 5              | (5.8%)        | 2                  | (2.4%)        |         |
| Phase 2                                                  | 15          | (15.6%)       | 28          | (30.4%)       | 13             | (15.1%)       | 19                 | (22.9%)       |         |
| Phase 3                                                  | 17          | (17.7%)       | 25          | (27.2%)       | 20             | (23.3%)       | 12                 | (14.5%)       |         |
| <b>B) Pivotal Trial</b>                                  |             |               |             |               |                |               |                    |               |         |
| Trial Design ‡                                           |             |               |             |               |                |               |                    |               | 0.822   |
| Phase 1                                                  | 4           | (4.2%)        | 3           | (3.2%)        | 5              | (5.8%)        | 3                  | (3.6%)        |         |
| Phase 2                                                  | 25          | (26.0%)       | 18          | (19.6%)       | 23             | (26.8%)       | 19                 | (21.7%)       |         |
| Phase 3                                                  | 67          | (70.8%)       | 71          | (77.2%)       | 58             | (67.4%)       | 61                 | (74.7%)       |         |
| Primary Endpoint                                         |             |               |             |               |                |               |                    |               | 0.985   |
| Surrogate                                                | 63          | (66.6%)       | 58          | (63.0%)       | 60             | (69.8%)       | 56                 | (67.5%)       |         |
| Clinical                                                 | 17          | (17.7%)       | 18          | (19.6%)       | 14             | (16.3%)       | 14                 | (16.9%)       |         |
| Co-Primary                                               | 16          | (16.7%)       | 16          | (17.4%)       | 12             | (13.9%)       | 13                 | (15.6%)       |         |
| MCBS                                                     |             |               |             |               |                |               |                    |               | 0.488   |
| Score of 1, 2, or 3                                      | 54          | (56.2%)       | 55          | (59.8%)       | 42             | (48.8%)       | 48                 | (57.8%)       |         |
| Score of 4 or 5                                          | 42          | (43.8%)       | 37          | (40.2%)       | 44             | (51.2%)       | 35                 | (42.2%)       |         |
| Enrolled Patients                                        |             |               |             |               |                |               |                    |               |         |
| Mean                                                     | 563         | [479-647]     | 600         | [525-685]     | 556            | [463-648]     | 579                | [485-673]     |         |
| Trial Length (months)                                    |             |               |             |               |                |               |                    |               |         |
| Mean                                                     | 33          | [30-37]       | 30          | [27-33]       | 34             | [30-39]       | 32                 | [28-36]       |         |
| <b>C) Treatment</b>                                      |             |               |             |               |                |               |                    |               |         |
| Treatment Type                                           |             |               |             |               |                |               |                    |               | 0.709   |
| Combination                                              | 17          | (17.7%)       | 18          | (19.6%)       | 12             | (14.0%)       | 12                 | (14.5%)       |         |
| Monotherapy                                              | 79          | (82.3%)       | 74          | (80.4%)       | 74             | (86.0%)       | 71                 | (85.5%)       |         |
| Line of Treatment                                        |             |               |             |               |                |               |                    |               | 0.959   |
| 2 <sup>nd</sup> , 3 <sup>rd</sup> , 4 <sup>th</sup> line | 61          | (63.5%)       | 55          | (59.8%)       | 53             | (62.6%)       | 52                 | (62.7%)       |         |
| 1 <sup>st</sup> line                                     | 35          | (36.5%)       | 37          | (40.2%)       | 33             | (38.4%)       | 31                 | (37.3%)       |         |
| <b>Observations</b>                                      | <b>96</b>   | <b>(100%)</b> | <b>92</b>   | <b>(100%)</b> | <b>86</b>      | <b>(100%)</b> | <b>83</b>          | <b>(100%)</b> |         |

**Table e2** Regulatory Approval Characteristics of Targeted Drugs Across the US (FDA), EU (EMA), Canada (HC), and Australia (TGA) – Continued

P-values calculated based on  $\chi^2$ -tests. FDA: US Food and Drug Administration, EMA: European Medicines Agency, HC: Health Canada, TGA: Therapeutics Goods Administration, MCBS: Magnitude of Clinical Benefit Scale (1: *low* benefit to 5: *high* benefit). † Highest Phase of *supporting* trials disclosed in the regulatory approval report (No supporting trial: 0, Phase 1: 1, Phase 2: 2, Phase 3: 3). ‡ Highest Phase *pivotal* trial disclosed in the regulatory approval report (Phase 1: 1, Phase 2: 2, Phase 3: 3).

|                            | (1)      | (2)      | (3)   | (4)      | (5)    | (6)      | (7)      | (8)      | (9)      | (10)  | (11)     | (12) |
|----------------------------|----------|----------|-------|----------|--------|----------|----------|----------|----------|-------|----------|------|
| (1) FDA Approval Sequence  | 1.00     |          |       |          |        |          |          |          |          |       |          |      |
| (2) Conditional Approval   | 0.18***  | 1.00     |       |          |        |          |          |          |          |       |          |      |
| (3) Priority Review        | 0.09     | -0.20*** | 1.00  |          |        |          |          |          |          |       |          |      |
| (4) Orphan Designation     | 0.21***  | 0.20***  | 0.13* | 1.00     |        |          |          |          |          |       |          |      |
| (5) Supporting Trials †    | 0.26***  | 0.07     | -0.06 | 0.01     | 1.00   |          |          |          |          |       |          |      |
| (6) Phase ‡                | -0.18*** | -0.48*** | 0.11* | -0.22*** | 0.03   | 1.00     |          |          |          |       |          |      |
| (7) Primary Endpoint       | -0.13*   | -0.14**  | -0.03 | -0.31*** | -0.01  | 0.34***  | 1.00     |          |          |       |          |      |
| (8) MCBS Score             | 0.17**   | 0.32***  | -0.10 | 0.29***  | 0.15** | -0.61*** | -0.52*** | 1.00     |          |       |          |      |
| (9) Enrolled Patients      | -0.04    | -0.23*** | 0.03  | -0.35*** | 0.05   | 0.48***  | 0.46***  | -0.36*** | 1.00     |       |          |      |
| (10) Trial Length (months) | -0.12*   | 0.17***  | -0.08 | -0.01    | -0.09  | -0.40*** | -0.12*   | 0.18***  | 0.03     | 1.00  |          |      |
| (11) Monotherapy           | 0.20***  | 0.08     | 0.06  | 0.21***  | 0.08   | -0.26*** | -0.51*** | 0.37***  | -0.38*** | 0.01  | 1.00     |      |
| (12) 1st Line Treatment    | -0.11*   | -0.23*** | 0.04  | -0.12*   | 0.03   | 0.27***  | 0.10     | -0.12*   | 0.11*    | -0.03 | -0.35*** | 1.00 |

**Table e3** Pearson Correlation Coefficients of Collected Variables

Indication approval sequence was determined by the FDA approval date (initial indication: 1, supplementary indication: 0). P-values: \*  $p < 0.05$ , \*\*  $p < 0.01$ , \*\*\*  $p < 0.001$ . MCBS: Magnitude of Clinical Benefit Scale (1: *low* benefit to 5: *high* benefit). † Highest Phase of supporting trials disclosed in the regulatory approval report (No supporting trial: 0, Phase 1: 1, Phase 2: 2, Phase 3: 3). ‡ Highest Phase pivotal trial disclosed in the regulatory approval report (Phase 1: 1, Phase 2: 2, Phase 3: 3).
