# Supplementary material for: Initial and supplementary indication approval of new targeted cancer drugs by the FDA, EMA, Health Canada, and TGA
Source: PubMed Central journal article supplement (PMC9288371; doi:10.1007/s10637-022-01227-5), 2022-04-07
Supplement: 10637_2022_1227_MOESM2_ESM.pdf [file 10637_2022_1227_MOESM2_ESM.pdf]

**Supplementary Table 1: QGRS/PQS sequences in SARS-CoV2 genome with overlap (forward strand)**

QGRS/PQS sequences found (overlaps included) (Forward strand)

| Position | Length | QGRS/PQS                                     | G-Score |
|----------|--------|----------------------------------------------|---------|
| 353      | 22     | <u>GGCTTTGGAGACTCCGTGGAGG</u>                | 13      |
| 353      | 25     | <b><u>GGCTTTGGAGACTCCGTGGAGGAGG</u></b>      | 16      |
| 353      | 25     | <u>GGCTTTGGAGACTCCGTGGAGGAGG</u>             | 10      |
| 353      | 25     | <u>GGCTTTGGAGACTCCGTGGAGGAGG</u>             | 7       |
| 359      | 19     | <u>GGAGACTCCGTGGAGGAGG</u>                   | 13      |
| 370      | 20     | <u>GGAGGAGGTCTTATCAGAGG</u>                  | 12      |
| 644      | 20     | <b><u>GGTAATAAAGGAGCTGGTGG</u></b>           | 15      |
| 653      | 23     | <u>GGAGCTGGTGGCCATAGTTACGG</u>               | 12      |
| 1462     | 27     | <u>GGGTGGTCGCACTATTGCCTTTGGAGG</u>           | 6       |
| 1463     | 26     | <b><u>GGTGGTCGCACTATTGCCTTTGGAGG</u></b>     | 6       |
| 1574     | 26     | <b><u>GGTGTTGTTGGAGAAGGTTCCGAAGG</u></b>     | 18      |
| 2714     | 29     | <b><u>GGCGGTGCACCAACAAAGGTTACTTTTGG</u></b>  | 10      |
| 3467     | 17     | <b><u>GGAGGAGGTGTTGCAGG</u></b>              | 15      |
| 3470     | 28     | <u>GGAGGTGTTGCAGGAGCCTTAAATAAGG</u>          | 10      |
| 4162     | 27     | <b><u>GGTTATACTACTAAAAAGGCTGGTGG</u></b>     | 6       |
| 4261     | 29     | <b><u>GGTTTAAATGGTTACTGTAGAGGAGG</u></b>     | 10      |
| 4262     | 28     | <u>GGTTTAAATGGTTACTGTAGAGGAGG</u>            | 10      |
| 8687     | 23     | <b><u>GGATACAAGGCTATTGATGGTGG</u></b>        | 14      |
| 10255    | 28     | <u>GGTACAGGCTGGTAATGTTCAACTCAGG</u>          | 9       |
| 10255    | 29     | <u>GGTACAGGCTGGTAATGTTCAACTCAGGG</u>         | 8       |
| 10261    | 30     | <b><u>GGCTGGTAATGTTCAACTCAGGGTTATTGG</u></b> | 9       |

|       |    |                                                 |    |
|-------|----|-------------------------------------------------|----|
| 10261 | 30 | <a href="#">GGCTGGTAATGTTCAACTCAGGGTTATTGG</a>  | 8  |
| 13385 | 20 | <a href="#">GGTATGTGGAAAGGTTATGG</a>            | 19 |
| 14947 | 28 | <a href="#">GGTTTTCCATTTAATAAATGGGGTAAGG</a>    | 4  |
| 15208 | 27 | <a href="#">GGAACAAGCAAATTCTATGGTGGTTGG</a>     | 6  |
| 15448 | 29 | <a href="#">GGCGGTTCACTATATGTTAAACCAGGTGG</a>   | 3  |
| 18296 | 23 | <a href="#">GGATTGGCTTCGATGTCGAGGGG</a>         | 9  |
| 22316 | 29 | <a href="#">GGTGATTCTTCTTCAGGTTGGACAGCTGG</a>   | 10 |
| 24199 | 30 | <a href="#">GGGTACAATCACTTCTGGTTGGACCTTTGG</a>  | 9  |
| 24200 | 29 | <a href="#">GGTACAATCACTTCTGGTTGGACCTTTGG</a>   | 10 |
| 24215 | 20 | <a href="#">GGTTGGACCTTTGGTGCAGG</a>            | 17 |
| 24268 | 24 | <a href="#">GGCTTATAGGTTTAATGGTATTGG</a>        | 19 |
| 25197 | 22 | <a href="#">GGCCATGGTACATTTGGCTAGG</a>          | 17 |
| 25203 | 28 | <a href="#">GGTACATTTGGCTAGGTTTTATAGCTGG</a>    | 14 |
| 25951 | 29 | <a href="#">GGTGGTTATACTGAAAAATGGGAATCTGG</a>   | 8  |
| 25951 | 29 | <a href="#">GGTGGTTATACTGAAAAATGGGAATCTGG</a>   | 7  |
| 26746 | 30 | <a href="#">GGATCACCGGTGG AATTGCTATCGCAATGG</a> | 7  |
| 28781 | 29 | <a href="#">GGCTTCTACGCAGAAGGGAGCAGAGGCCGG</a>  | 9  |
| 28781 | 29 | <a href="#">GGCTTCTACGCAGAAGGGAGCAGAGGCCGG</a>  | 8  |
| 28881 | 28 | <a href="#">GGGGA ACTTCTCCTGCTAGAATGGCTGG</a>   | 3  |
| 28903 | 15 | <a href="#">GGCTGGCAATGGCGG</a>                 | 18 |
| 29123 | 19 | <a href="#">GGAAATTTTGGGGACCAGG</a>             | 14 |
| 29132 | 26 | <a href="#">GGGGACCA GGA ACTAATCAGACAAGG</a>    | 7  |
| 29234 | 30 | <a href="#">GGCATGG AAGTCACACCTTCGGGAACGTGG</a> | 11 |
| 29234 | 30 | <a href="#">GGCATGG AAGTCACACCTTCGGGAACGTGG</a> | 10 |

**Supplementary Table 2: QGRS/PQS sequences in SARS-CoV2 genome with overlap (reverse strand)**

QGRS/PQS sequences found (overlaps included) (Reverse strand)

| Position | Length | QGRS/PQS                                     | G-Score |
|----------|--------|----------------------------------------------|---------|
| 165      | 22     | <b><u>GGCCTCGGTGAAAATGTGGTGG</u></b>         | 13      |
| 2987     | 29     | <b><u>GGTCTGGTCAGAATAGTGCCATGGAGTGG</u></b>  | 9       |
| 6822     | 30     | <b><u>GGTTGGTAACCAACACCATTAGTGGGTTGG</u></b> | 6       |
| 6822     | 30     | <b><u>GGTTGGTAACCAACACCATTAGTGGGTTGG</u></b> | 5       |
| 11420    | 28     | <b><u>GGTGTTTAAATTGATCTCCAGGCGGTGG</u></b>   | 4       |
| 11440    | 25     | <b><u>GGCGGTGGTTTAGCACTAACTCTGG</u></b>      | 7       |
| 13136    | 19     | <b><u>GGTTAAGTGGTGGTCTAGG</u></b>            | 16      |
| 13944    | 27     | <b><u>GGCCCCTAGGATTCTTGATGGATCTGG</u></b>    | 16      |
| 13944    | 28     | <b><u>GGCCCCTAGGATTCTTGATGGATCTGGG</u></b>   | 17      |
| 13952    | 25     | <b><u>GGATTCTTGATGGATCTGGGTAAGG</u></b>      | 16      |
| 13952    | 25     | <b><u>GGATTCTTGATGGATCTGGGTAAGG</u></b>      | 15      |
| 13952    | 29     | <b><u>GGATTCTTGATGGATCTGGGTAAGGAAGG</u></b>  | 16      |
| 13952    | 29     | <b><u>GGATTCTTGATGGATCTGGGTAAGGAAGG</u></b>  | 17      |
| 13952    | 29     | <b><u>GGATTCTTGATGGATCTGGGTAAGGAAGG</u></b>  | 13      |
| 13952    | 29     | <b><u>GGATTCTTGATGGATCTGGGTAAGGAAGG</u></b>  | 8       |
| 13952    | 29     | <b><u>GGATTCTTGATGGATCTGGGTAAGGAAGG</u></b>  | 7       |
| 13963    | 18     | <b><u>GGATCTGGGTAAGGAAGG</u></b>             | 19      |
| 13963    | 18     | <b><u>GGATCTGGGTAAGGAAGG</u></b>             | 18      |
| 16623    | 27     | <b><u>GGATTTGGATGATCTATGTGGCAACGG</u></b>    | 14      |
| 19865    | 21     | <b><u>GGTGATAGAGGTTTGTGGTGG</u></b>          | 15      |

|       |    |                                         |    |
|-------|----|-----------------------------------------|----|
| 19865 | 25 | <b><u>GGTGATAGAGGTTTGTGGTGGTTGG</u></b> | 19 |
| 19865 | 25 | <u>GGTGATAGAGGTTTGTGGTGGTTGG</u>        | 15 |
| 19865 | 25 | <u>GGTGATAGAGGTTTGTGGTGGTTGG</u>        | 8  |
| 19874 | 16 | <u>GGTTTGTGGTGGTTGG</u>                 | 17 |
| 23877 | 17 | <b><u>GGATATGGTTGGTTTGG</u></b>         | 19 |
| 23883 | 26 | <u>GGTTGGTTTGGTACAAGATCAATTGG</u>       | 10 |
| 25003 | 16 | <b><u>GGTGGAAATGTGGTAGG</u></b>         | 17 |
| 27432 | 24 | <b><u>GGGGCTTTTAGAGGCATGAGTAGG</u></b>  | 13 |
| 29867 | 23 | <b><u>GGTTGGTTTGTACCTGGGAAGG</u></b>    | 13 |
| 29867 | 23 | <u>GGTTGGTTTGTACCTGGGAAGG</u>           | 12 |
